# Supplementary material for: Anti-CTLA4 treatment reduces lymphedema risk potentially through a systemic expansion of the FOXP3+ Treg population
Source: Springer Nature journal article supplement (doi:10.1038/s41467-024-55002-6), 2024-12-30
Supplement: MOESM1 [file 41467_2024_55002_MOESM1_ESM.pdf]

## **Anti-CTLA4 treatment reduces lymphedema risk through a systemic expansion of the FOXP3+ T<sub>reg</sub> population**

**Authors:** Stefan Wolf<sup>1</sup>, Matiar Madanchi<sup>2</sup>, Patrick Turko<sup>2,3</sup>, Majja Hollmén<sup>4</sup>, Sonia Tugues<sup>5</sup>, Julia von Atzigen<sup>1</sup>, Pietro Giovanoli<sup>1</sup>, Reinhard Dummer<sup>2</sup>, Nicole Lindenblatt<sup>1</sup>, Cornelia Halin<sup>6</sup>, Michael Detmar<sup>6</sup>, Mitchell Levesque<sup>2</sup>, Epameinondas Gousopoulos<sup>1</sup>

### **Affiliations:**

<sup>1</sup>Division of Plastic Surgery, University Hospital Zurich, University of Zurich, 8091 Zurich, Switzerland.

<sup>2</sup>Division of Dermatology, University Hospital Zurich, University of Zurich, 8091 Zurich, Switzerland.

<sup>3</sup>Bioinformatic Department, University Hospital Zurich, University of Zurich, 8091 Zurich, Switzerland.

<sup>4</sup>MediCity Research Laboratory, University of Turku, 20520 Turku, Finland.

<sup>5</sup>Institute of Experimental Immunology, University of Zurich, 8057 Zurich, Switzerland.

<sup>6</sup>Institute of Pharmaceutical Sciences, ETH Zurich, 8093 Zurich, Switzerland.

## **Inventory of Supplementary Information**

**Suppl. Figure 1:** Stage depended evaluation of the immune cell infiltration in lymphedematous tissue

**Suppl. Figure 2:** Upregulated “Toxic Pathologies” in mice two weeks after lymphedema induction

**Suppl. Figure 3:** Flow cytometry gating example for single cells isolated lymphedematous tissue and PBMCs from mice and humans

**Suppl. Figure 4:** Anti-CTLA4 treatment exhibits efficacy in the lymphedema mouse tail model

**Suppl. Figure 5:** AUC quantification of tail volume in BALB/c and C57BL/6 mice.

**Suppl. Figure 6:** Absolute cell count measurement of Treg cells in blood and edematous skin tail tissue.

**Suppl. Table 1:** Localization of lymphedema in 81 melanoma patients

**Suppl. Table 2:** Lymphedema development and number of lymph nodes removed in melanoma patients undergoing sentinel lymph node biopsy

**Suppl. Table 3:** Patient characteristics of melanoma patients undergoing lymphadenectomy

**Suppl. Table 4:** Patient characteristics of each melanoma patient underwent lymphadenectomy and developed lymphedema

**Suppl. Table 5:** Comparison of treated and untreated melanoma patients which underwent lymphadenectomy and developed lymphedema

**Suppl. Table 6:** Comparison of melanoma patients, treated with different immunotherapies, which underwent lymphadenectomy and developed lymphedema

**Suppl. Table 7:** Lymphedema patient characteristics from the patients that have been used for histological and molecular characterization

**Suppl. Table 8:** Human primer list used for qPCRs

**Suppl. Table 9:** Murine primer list used for qPCRs

**Suppl. Table 10:** List of mouse flow cytometry antibodies

**Suppl. Table 11:** List of human flow cytometry antibodies

**Suppl. Table 12:** Treatment details of Anti CTLA4 treated melanoma patients

**Reference List**

## Supplementary Material

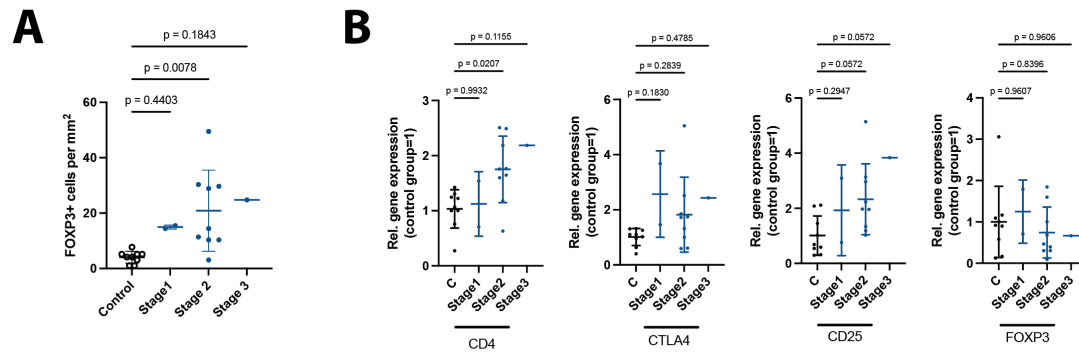

**Suppl. Figure 1: Stage depended evaluation of the immune cell infiltration in lymphedematous tissue (A) Evaluation of stage depended FOXP3+ quantification (B) Evaluation of stage depended evaluation of CD4, CTLA4, CD25 and FOXP3 mRNA expression in human subcutaneous fat tissue (N(C)=9 patients and N(LE)=12 patients and significance was determined via an one way ANOVA test followed by a Dunnet test was used. Line represent mean  $\pm$  SD of each group.**

## UPregulated genes - Toxic Pathologies

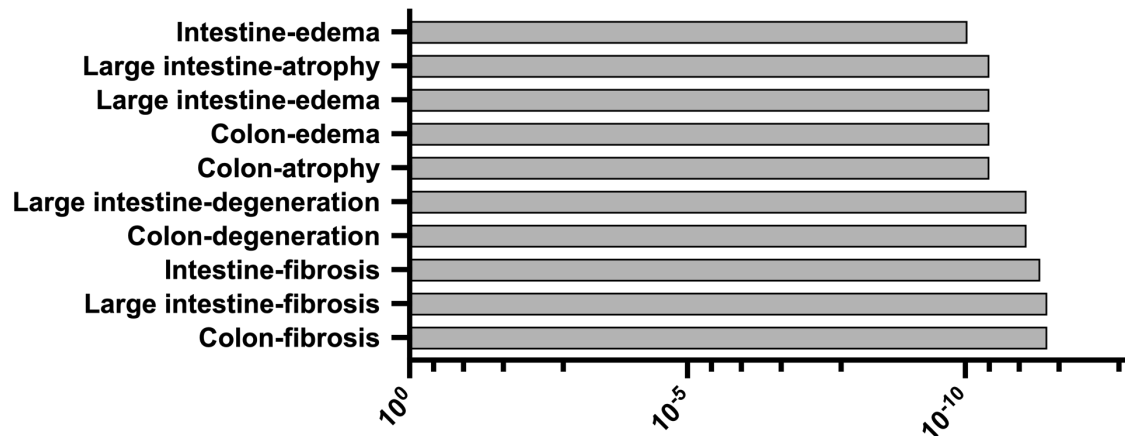

**Suppl. Figure 2: Upregulated “Toxic Pathologies” in mice two weeks after lymphedema induction.** Re-analysis of the RNA sequencing in C57BL/6 mice two weeks after lymphedema induction, using the data obtained by Gousopoulos *et al.*<sup>1</sup> and the MetaCore “Toxic Pathologies” revealed the key pathways involved in lymphedema development, namely fibrosis, tissue degeneration and edema. These pathways are the major pathways downregulated by anti-CTLA4 treatment in Figure 5H.

These key hallmarks are all related to intestine and colon tissue, because fibrosis and edema in mouse skin and soft tissue are understudied, thus lacking the appropriate number of reference genes. According to MetaCore, colon edema is represented with 1259 reference genes, while skin edema counts 110 references. Similarly, colon fibrosis has 913 gene references, while skin fibrosis 84.

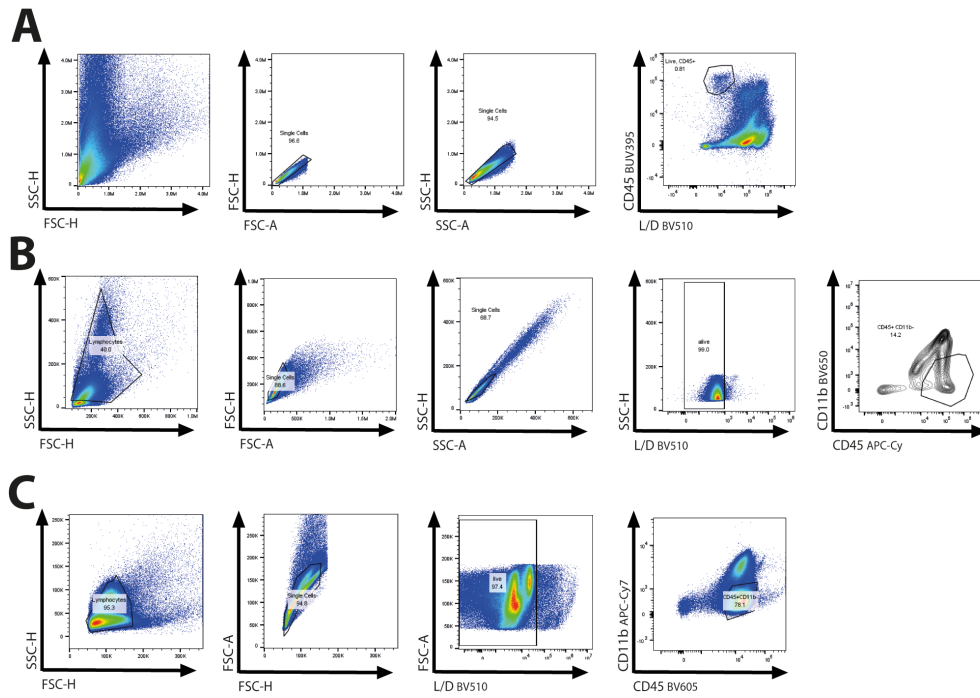

**Suppl. Figure 3:** Flow cytometry gating example for single cells isolated lymphedematous tissue (Figure 5 A-D) (A) and PBMCs from mice (Figure 4 E-F) (B) and humans (Figure 6 A-D) (C)

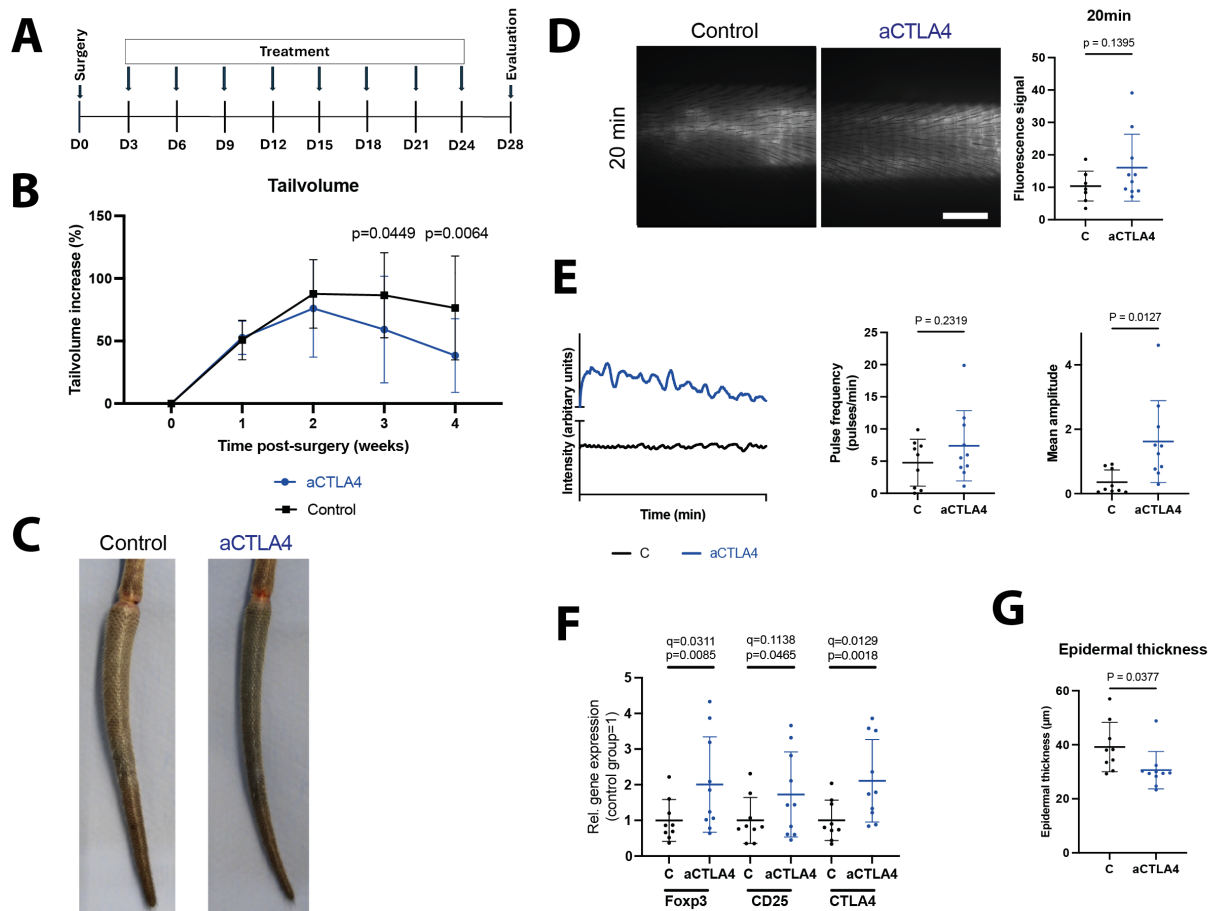

**Suppl. Figure 4: Anti-CTLA4 treatment exhibits efficacy in the lymphedema mouse tail model** (A) Surgery was performed on day 0 (D0), treatment was given on day 3, 6, 9, 12, 15, 18 and 24 (D3, D6, D9, D12, D15, D18, D21, D24) and evaluation/endpoint was in day 28 (D28). (B) Anti-CTLA4 administration (aCTLA4) following the surgical induction of lymphedema leads to significantly reduced edema 3 and 4 weeks (W) after surgery. (C) Representative photographs of tails of control and anti-CTLA4 (aCTLA4)-treated mice 4 weeks postoperatively. (D) Representative images of near-infrared intravital microscopy of the tail lymphatic network approx. 1.5 cm distally to the surgical site, visualized through the uptake and transport of a lymphatic-specific fluorescent tracer 20 minutes after infusion near the tip of the tail. Quantification of lymphatic vascular transport based on fluorescence intensity. Scale bar: 2000  $\mu\text{m}$  (E) Graphical representation of lymphatic vessel pulsations in the tail collecting vessels of mice treated with or without aCTLA4 4 weeks. Quantification of pulsation frequency and amplitude is shown to the right (F) Gen expression analysis from Treg related genes. (G) Quantification of the epidermal thickness

All experiments show data from 9 control mice (C) and 10 aCTLA4 treated mice (aCTLA4). Line represent mean  $\pm$  SD of each group. Significance was determined via a 2-way ANOVA followed by a Bonferroni's multiple comparisons test (B), a Welch's  $t$ -test (D, E) and an ANOVA and the pairwise multiple comparison analysis was corrected for multiple comparisons with the method of Benjamini, Krieger and Yekutieli (F).

Significance was determined via Bonferroni's multiple comparisons test (B), Welch's *t*-test (D,E and G) and ANOVA and the pairwise multiple comparison analysis was corrected for multiple comparisons the method of Benjamini, Krieger and Yekutieli (D).).

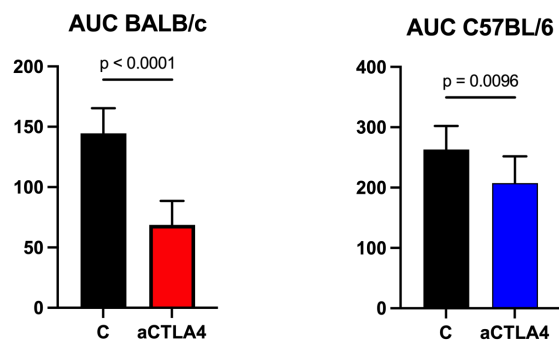

**Suppl. Figure 5:** AUC quantification of tail volume in BALB/c and C57BL/6 mice. Significance was determined via Welch's *t*-test. Data show mean  $\pm$  SD of each group.

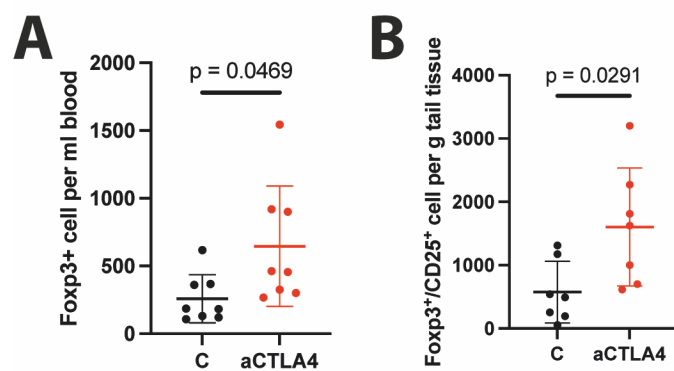

**Suppl. Figure 6:** Absolute cells count measurement of T<sub>reg</sub> cells in blood. (N(C)=8 mice and N(aCTLA4)=8 mice (A) and edematous skin tail tissue (N(C)=7 mice and N(aCTLA4)=7 mice). (B). Significance was determined via Welch's *t*-test. Line represent mean  $\pm$  SD of each group.



**Suppl. Table 1:** Localization of lymphedema in 81 melanoma patients

| <b>Localisation Lymphedema</b>   | <b>N° of patients</b> |
|----------------------------------|-----------------------|
| <b>Upper extremity</b>           | 21(26,0%)             |
| <b>Lower extremity</b>           | 57 (70.4%)            |
| <b>Upper + Lower extremities</b> | 1 (1.2%)              |
| <b>Neck</b>                      | 2 (2.5%)              |

**Suppl. Table 2:** Lymphedema development and number of lymph nodes removed in melanoma patients undergoing sentinel lymph node biopsy (SLNB)

| LE after SLNB                   | N° of patients |
|---------------------------------|----------------|
| Total number                    | 13             |
| Anatomic localization of LE:    |                |
| Upper extremity                 | 1              |
| Lower extremity                 | 12             |
| N° of lymph nodes (LN) removed: |                |
| 1 LN                            | 8              |
| 2 LN                            | 2              |
| 3 LN                            | 2              |
| 4 LN                            | 1              |

**Suppl. Table 3:** Patient characteristics of melanoma patients undergoing lymphadenectomy (LAD). A multivariate generalized linear model (logistic link) was applied to assess the influence of age, sex, Clark-level, Breslow thickness, localisation, presence of ulceration, primary diagnosis, and immunotherapy, indicating strongly that only immunotherapy is significantly associated with the probability of developing lymphedema.

|                              | NO<br>Lymphedema | Lymphedema    | p-value |
|------------------------------|------------------|---------------|---------|
| n                            | 411              | 68            |         |
| Age (mean (SD))              | 63.30 ± 14.58    | 62.63 ± 14.20 | 0.446   |
| Sex = M (%)                  | 252 (61.3 %)     | 33 (48.5 %)   | 0.727   |
| Breslow (mean (SD))          | 3.61 ± 3.26      | 2.96 ± 2.78   | 0.265   |
| Clark.Level (mean (SD))      | 3.85 ± 0.69      | 3.84 ± 0.69   | 0.356   |
| Diagnosis (%)                |                  |               | 0.597   |
| Cerebral metastatic melanoma | 41 (10.0 %)      | 3 (4.4 %)     |         |
| Lymphoid metastatic melanoma | 0 (0.0 %)        | 1 (1.5 %)     |         |
| Metastatic melanoma          | 315 (76.6 %)     | 52 (76.5 %)   |         |
| Primary cutaneous melanoma   | 55 (13.4 %)      | 12 (17.6 %)   |         |
| Localization (%)             |                  |               | 0.486   |
|                              | 21 (5.1 %)       | 4 (5.9 %)     |         |
| arm                          | 77 (18.7 %)      | 10 (14.7 %)   |         |
| foot left                    | 1 (0.2 %)        | 0 (0.0 %)     |         |
| head                         | 38 (9.2 %)       | 2 (2.9 %)     |         |
| leg                          | 123 (29.9 %)     | 43 (63.2 %)   |         |
| trunk                        | 151 (36.7 %)     | 9 (13.2 %)    |         |
| Ulceration (%)               | 104 (28.8 %)     | 12 (20.3 %)   | 0.738   |
| Immunotherapy                | 238 (89.5%)      | 28 (10.5%)    | 0.0005  |

**Suppl. Table 4:** Patient characteristics of each melanoma patient underwent lymphadenectomy and developed lymphedema.

| Pat. No | Treatment        | Month from LAD to diagnosis | Diagnosis performed by | Lymphedema Stage  | Diagnosis methode |
|---------|------------------|-----------------------------|------------------------|-------------------|-------------------|
| 1       | No immunotherapy | 1                           | Angiologist            | Penoscrotal edema | Sonography        |
| 2       | No immunotherapy | 2                           | Dermatologist          | Stage 2           | Sonography        |
| 3       | No immunotherapy | 2                           | Plastic surgeon        | Stage 2           | MRI               |
| 4       | No immunotherapy | 3                           | Dermatologist          | Stage 2           | Sonography        |
| 5       | No immunotherapy | 1                           | Dermatologist          | Stage 2           | Sonography        |
| 6       | No immunotherapy | 1                           | Plastic surgeon        | Stage 2           | CT                |
| 7       | No immunotherapy | 1                           | Plastic surgeon        | Stage 3           | MRI               |
| 8       | No immunotherapy | 4                           | Angiologist            | Stage 3           | CT                |
| 9       | No immunotherapy | 3                           | Plastic surgeon        | Stage 3           | MRI               |
| 10      | No immunotherapy | 8                           | Plastic surgeon        | Stage 3           | MRI               |
| 11      | No immunotherapy | 1                           | Plastic surgeon        | Stage 3           | CT                |
| 12      | No immunotherapy | 4                           | Dermatologist          | Stage 2           | CT                |
| 13      | No immunotherapy | 5                           | Dermatologist          | Stage 3           | MRI               |
| 14      | No immunotherapy | 1                           | Plastic surgeon        | Stage 2           | Sonography        |
| 15      | No immunotherapy | 2                           | Plastic surgeon        | Stage 3           | Sonography        |
| 16      | No immunotherapy | 3                           | Angiologist            | Stage 3           | CT                |
| 17      | No immunotherapy | 1                           | Dermatologist          | Stage 3           | MRI               |

|    |                  |    |                 |         |            |
|----|------------------|----|-----------------|---------|------------|
| 18 | No immunotherapy | 5  | Plastic surgeon | Stage 3 | CT         |
| 19 | No immunotherapy | 1  | Dermatologist   | Stage 3 | CT         |
| 20 | No immunotherapy | 1  | Plastic surgeon | Stage 2 | MRI        |
| 21 | No immunotherapy | 7  | Dermatologist   | Stage 2 | CT         |
| 22 | No immunotherapy | 48 | Angiologist     | Stage 2 | Sonography |
| 23 | No immunotherapy | 2  | Plastic surgeon | Stage 2 | MRI        |
| 24 | No immunotherapy | 12 | Angiologist     | Stage 3 | Sonography |
| 25 | No immunotherapy | 1  | Angiologist     | Stage 2 | Sonography |
| 26 | No immunotherapy | 1  | Plastic surgeon | Stage 2 | MRI        |
| 27 | No immunotherapy | 2  | Plastic surgeon | Stage 3 | MRI        |
| 28 | No immunotherapy | 1  | Plastic surgeon | Stage 3 | MRI        |
| 29 | No immunotherapy | 1  | Dermatologist   | Stage 3 | CT         |
| 30 | No immunotherapy | 1  | Plastic surgeon | Stage 2 | CT         |
| 31 | No immunotherapy | 1  | Angiologist     | Stage 3 | Sonography |
| 32 | No immunotherapy | 2  | Plastic surgeon | Stage 2 | MRI        |
| 33 | No immunotherapy | 1  | Plastic surgeon | Stage 3 | MRI        |
| 34 | No immunotherapy | 3  | Plastic surgeon | Stage 2 | CT         |
| 35 | No immunotherapy | 10 | Angiologist     | Stage 2 | Sonography |
| 36 | No immunotherapy | 3  | Dermatologist   | Stage 2 | CT         |
| 37 | No immunotherapy | 1  | Dermatologist   | Stage 3 | MRI        |

|    |                       |    |                 |         |            |
|----|-----------------------|----|-----------------|---------|------------|
| 38 | No immunotherapy      | 1  | Angiologist     | Stage 3 | Sonography |
| 39 | No immunotherapy      | 3  | Dermatologist   | Stage 3 | MRI        |
| 40 | No immunotherapy      | 3  | Angiologist     | Stage 3 | Sonography |
| 41 | Anti-CTLA4            | 3  | Plastic surgeon | Stage 2 | CT         |
| 42 | Anti-CTLA4            | 3  | Plastic surgeon | Stage 3 | MR         |
| 43 | Anti-PD1              | 2  | Plastic surgeon | Stage 2 | MRI        |
| 44 | Anti-PD1              | 9  | Angiologist     | Stage 3 | CT         |
| 45 | Anti-PD1              | 8  | Dermatologist   | Stage 3 | Sonography |
| 46 | Anti-PD1              | 6  | Dermatologist   | Stage 3 | CT         |
| 47 | Anti-PD1              | 7  | Dermatologist   | Stage 3 | MRI        |
| 48 | Anti-PD1              | 2  | Angiologist     | Stage 2 | Sonography |
| 49 | Anti-PD1              | 11 | Dermatologist   | Stage 2 | CT         |
| 50 | Anti-PD1              | 1  | Plastic surgeon | Stage 3 | MRI        |
| 51 | Anti-PD1              | 1  | Plastic surgeon | Stage 2 | MRI        |
| 52 | Anti-PD1              | 5  | Angiologist     | Stage 2 | Sonography |
| 53 | Anti-PD1              | 2  | Plastic surgeon | Stage 2 | MRI        |
| 54 | Anti-PD1 + Anti-CTLA4 | 6  | Plastic surgeon | Stage 3 | MRI        |
| 55 | Anti-PD1 + Anti-CTLA4 | 1  | Dermatologist   | Stage 3 | Sonography |
| 56 | Anti-PD1 + Anti-CTLA4 | 1  | Angiologist     | Stage 3 | MRI        |
| 57 | Anti-PD1 + Anti-CTLA4 | 1  | Plastic surgeon | Stage 3 | MRI        |

|    |                       |    |                 |         |            |
|----|-----------------------|----|-----------------|---------|------------|
| 58 | Anti-PD1 + Anti-CTLA4 | 2  | Plastic surgeon | Stage 3 | CT         |
| 59 | Anti-PD1 + Anti-CTLA4 | 15 | Plastic surgeon | Stage 2 | CT         |
| 60 | Anti-PD1 + Anti-CTLA4 | 8  | Dermatologist   | Stage 2 | CT         |
| 61 | Anti-PD1 + Anti-CTLA4 | 31 | Dermatologist   | Stage 3 | MRI        |
| 62 | Anti-PD1 + Anti-CTLA4 | 1  | Plastic surgeon | Stage 3 | CT         |
| 63 | others                | 1  | Plastic surgeon | Stage 2 | Sonography |
| 64 | others                | 4  | Dermatologist   | edema   | CT         |
| 65 | others                | 1  | Plastic surgeon | Stage 2 | MRI        |
| 66 | others                | 4  | Dermatologist   | Stage 3 | MRI        |
| 67 | others                | 1  | Dermatologist   | Stage 3 | MRI        |
| 68 | others                | 2  | Dermatologist   | Stage 2 | MRI        |

**Suppl. Table 5:** Comparison of treated and untreated melanoma patients which underwent lymphadenectomy and developed lymphedema. Differences in continuous variables (Time between LAD to diagnosis) were tested with a t-test, while differences in categorical variables were tested with Chi square Test.

|                                       | <b>NO<br/>immunotherapy</b> | <b>immunotherapy</b> | <b>p-value</b> |
|---------------------------------------|-----------------------------|----------------------|----------------|
| <b>Patient No.</b>                    | 40                          | 28                   |                |
| <b>Time from LAD<br/>to diagnosis</b> | 3.85 ± 7.60                 | 4.96 ± 6.24          | 0.511          |
| <b>Edema Type</b>                     |                             |                      |                |
| Stage 2                               | 18 (45,0%)                  | 13 (46.4 %)          | 1.00           |
| Stage 3                               | 21 (52.5%)                  | 15 (53.6 %)          |                |
| Penoscrotal<br>edema                  | 1 (2.5%)                    |                      |                |
| <b>Diagnosis by</b>                   |                             |                      |                |
| Plastic<br>surgeon                    | 18(45.0%)                   | 13 (46.4%)           |                |
| Angiologist                           | 10 (25.0%)                  | 4 (14.3%)            |                |
| Dermatologist                         | 12 (30.0%)                  | 11 (32.3%)           |                |
| <b>Diagnosis<br/>Methode</b>          |                             |                      |                |
| CT                                    | 12 (30.0%)                  | 9 (32.1%)            |                |
| Sonography                            | 13 (32.5%)                  | 5 (17.9%)            |                |
| MRI                                   | 15 (37.5%)                  | 14 (50%)             |                |



**Suppl. Table 6:** Comparison of melanoma patients, treated with different immunotherapies, which underwent lymphadenectomy and developed lymphedema. Differences in continuous variables (Time between LAD to diagnosis) were tested with a ANOVA, while differences in categorical variables were tested with Chi square Test.

|                                   | NO IT       | Anti-CTLA4 | Anti-PD1    | Anti-PD1 + Anti-CTLA4 | Others      | p-value |
|-----------------------------------|-------------|------------|-------------|-----------------------|-------------|---------|
| <b>Patient No.</b>                | 40          | 2          | 11          | 9                     | 6           |         |
| <b>Time from LAD to diagnosis</b> | 3.85 ± 7.60 | 3 ± 0.00   | 4.91 ± 3.54 | 7.33 ± 10.06          | 2.17 ± 1.47 | 0.651   |
| <b>Edema Type</b>                 |             |            |             |                       |             |         |
| Stage 2                           | 18 (45,0%)  | 1 (50.0%)  | 6 (54.5%)   | 2 (22.2%)             | 4 (66.6%)   | 0.596   |
| Stage 3                           | 21 (52.5%)  | 1 (50.0%)  | 5 (45.5%)   | 7 (77.8%)             | 2 (33.3%)   |         |
| Penoscrotal edema                 | 1 (2.5%)    |            |             |                       |             |         |
| <b>Diagnosis by</b>               |             |            |             |                       |             |         |
| Plastic surgeon                   | 18(45.0%)   | 2 (100%)   | 4 (36.4 %)  | 5 (55.6%)             | 2 (33.3%)   |         |
| Angiologist                       | 10 (25.0%)  |            | 3 (27.3%)   | 1 (11.1%)             |             |         |
| Dermatologist                     | 12 (30.0%)  |            | 4 (36.4 %)  | 3 (33.3%)             | 4 (66.6%)   |         |
| <b>Diagnosis Methode</b>          |             |            |             |                       |             |         |
| CT                                | 12 (30.0%)  | 1 (50.0%)  | 3 (27.3%)   | 4 (44.4%)             | 1 (16.7%)   |         |
| Sonography                        | 13 (32.5%)  |            | 3 (27.3%)   | 1 (11.1%)             | 1 (16.7%)   |         |
| MRI                               | 15 (37.5%)  | 1 (50.0%)  | 5 (45.5%)   | 4 (44.4%)             | 4 (66.6 %)  |         |

**Suppl. Table 7:** Lymphedema patient characteristics from the patients that have been used for histological and molecular characterization.

|                     | Control      | Lymphedema   |
|---------------------|--------------|--------------|
| Number of cases     | 9            | 12           |
| Gender              |              |              |
| Female              | 7            | 10           |
| Male                | 2            | 2            |
| Average BMI         | 27.86 ± 4.48 | 27.12 ± 3.21 |
| Average Age         | 48.45 ± 9.50 | 59.21 ± 9.82 |
| Lymphedema Stage    |              |              |
| Stage 1             |              | 2            |
| Stage 2             |              | 9            |
| Stage 3             |              | 1            |
| Harvesting location | 8            | 9            |
| Lower extremity     |              |              |
| Upper extremity     | 1            | 3            |

**Suppl. Table 8:** Human primer list used for qPCRs

| <b>Primer</b> | <b>Sequence (5' to 3')</b>      |
|---------------|---------------------------------|
| B2M forward   | TGT GCT CGC GCT ACT CTC TCT     |
| B2M reverse   | CGG ATG GAT GAA ACC CAG ACA     |
| CD4 forward   | CCT CCT GCT TTT CAT TGG GCT AGG |
| CD4 reverse   | TGA GGA CAC TGG CAG GTC TTC T   |
| CTLA4 forward | ACG GGA CTC TAC ATC TGC AAG G   |
| CTLA4 reverse | GGA GGA AGT CAG AAT CTG GGC AC  |
| CD25 forward  | GAG ACT TCC TGC CTC GTC ACA AC  |
| CD25 reverse  | GAT CAG CAG GAA AAC ACA GCC G   |
| FOXP3 forward | CAC TGG TTC ACA CGC ATG TTT     |
| FOXP3 reverse | CAC CCG CAC AAA GCA CTT G       |

**Suppl. Table 9:** Murine primer list used for qPCRs

| <b>Primer</b> | <b>Sequence (5' to 3')</b>        |
|---------------|-----------------------------------|
| Rplp0 forward | AGA TTC GGG ATA TGC TGT TGG C     |
| Rplp0 reverse | TCG GGT CCT AGA CCA GTG TTC       |
| Il2 forward   | GCG GCA TGT TCT GGA TTT GAC TC    |
| Il2 reverse   | CCA CCA CAG TTG CTG ACT CAT C     |
| Infg forward  | CAG CAA CAG CAA GGC GAA AAA GG    |
| Infg reverse  | TTT CCG CTT CCT GAG GCT GGA T     |
| Tnfa forward  | AGC ACA GAA AGC ATG ATC CG        |
| Tnfa reverse  | GTT TGC TAC GAC GTG GGC TA        |
| Il10 forward  | ACA GCC GGG AAG ACA ATA ACT       |
| Il10 reverse  | GCA GCT CTA GGA GCA TGT GG        |
| Il13 forward  | CAC ACA AGA CCA GAC TCC CC        |
| Il13 reverse  | CCA GGG ATG GTC TCT CCT CA        |
| Ccr4 forward  | TCC TGA CGG ACG TGT ACC T         |
| Ccr4 reverse  | CAG ACC TAG TCC AAA AAC CCA C     |
| Ccr8 forward  | TTC CTC TAC TTA GGG AGA CAA ATG C |
| Ccr8 reverse  | CAT CCA GGG TGG AAG AAT GG        |
| Ctla4 forward | GTA CCT CTG CAA GGT GGA ACT C     |
| Ctla4 reverse | CCA AAG GAG GAA GTC AGA ATC CG    |
| Foxp3 forward | ACT GGG GTC TTC TCC CTC AA        |
| Foxp3 reverse | CGT GGG AAG GTG CAG AGT AG        |
| CD25 forward  | AAG ATG AAG TGT GGG AAA ACG G     |
| CD25 reverse  | GGG AAG TCT GTG GTG GTT ATG G     |

**Suppl. Table 10:** List of mouse flow cytometry antibodies

| Antibody                     | Clone        | Dilution | Cat. Nr.    | Company       |
|------------------------------|--------------|----------|-------------|---------------|
| <b>Surface Markers</b>       |              |          |             |               |
| CD73-APC-Fire                | TY/11.8      | 1:200    | 127221      | Biolegend     |
| CD45-BUV395                  | 30-F11       | 1:500    | 564279      | BD            |
| CD11b-BUV661                 | M1/70        | 1:500    | 612977      | BD            |
| CD8-BUV805                   | 53-6.7       | 1:100    | 612898      | BD            |
| LAG3-BV421                   | C9B7W        | 1:100    | 125221      | Biolegend     |
| CD44-BV570                   | IM7          | 1:200    | 103037      | Biolegend     |
| PD1-BV605                    | 29F.1A12     | 1:100    | 135219      | Biolegend     |
| CD25-BV650                   | PC61         | 1:100    | 102037      | Biolegend     |
| TIM3-BV785                   | RMT3-23      | 1:200    | 119725      | Biolegend     |
| NKp46-FITC                   | 29A1.4       | 1:200    | 137605      | Biolegend     |
| TCRb-PE-Cy5                  | H57-597      | 1:300    | 109209      | Biolegend     |
| CD127-PE-Cy7                 | SB/199       | 1:200    | 560733      | BD            |
| CD39-PerCP-eFluor 710        | 24DMS1       | 1:500    | 46-0391-80  | Thermo        |
| CD19-Spark Blue550           | 6D5          | 1:100    | 115565      | Biolegend     |
| CD27-V450                    | LG.3A10      | 1:200    | 561245      | BD            |
| CD45-APC-Cy7                 | 30-F11       | 1:200    | 103116      | Biolegend     |
| CD4-APC                      | GK1.5        | 1:200    | 100412      | Biolegend     |
| CD8a-eFluor 450              | 53-6.7       | 1:200    | 48-0081-82  | eBioscience   |
| Foxp3- PE                    | FJK-16s      | 1:100    | 12-5773-82  | eBioscience   |
| CD11b -BV650                 | M1/70        | 1:200    | 101239      | Biolegend     |
|                              |              |          |             |               |
| <b>Intracellular Markers</b> |              |          |             |               |
| CD4-BUV496                   | GK1.5        | 1:100    | 612952      | BD            |
| TCF-Alexa Fluor 647          | C63D9        | 1:200    | 6709S       | CellSignaling |
| CTLA4-APC-R700               | UC10-4F10-11 | 1:1600   | 565778      | BD            |
| FOXP3-PE-eFlour610           | FJK-16s      | 1:100    | 61-5773-80  | Thermo        |
| TNF-BV711                    | MP6-XT22     | 1:100    | 506349      | Biolegend     |
| IFN $\gamma$ -BUV737         | XMG1.2       | 1:100    | 612769      | BD            |
| Ki67-BV480                   | B56          | 1:200    | 566172      | BD            |
| TOX-PE                       | REA473       | 1:200    | 130-120-785 | Miltenyl      |
| FOXP3- PE                    | FJK-16s      | 1:100    | 12-5773-82  | eBioscience   |

**Suppl. Table 11:** List of human flow cytometry antibodies

| Antibody            | Clone    | Dilution | Cat. Nr.   | Company   |
|---------------------|----------|----------|------------|-----------|
| CD45-BV605          | HI30     | 1:200    | 304041     | Biolegend |
| CD4-APC             | SK3      | 1:200    | 344613     | Biolegend |
| CD8a-PerCP/Cy5.5    | RPA-T8   | 1:200    | 301032     | Biolegend |
| CD25-APC-A700       | 2A3      | 1:50     | 565106     | BD        |
| Foxp3- PE/Cy 7      | 236A/E7  | 1:100    | 25-4777-42 | Thermo    |
| CD127 – BV650       | A019D5   | 1:400    | 351325     | Biolegend |
| CD11b -APC/Cyanine7 | ICRF44   | 1:200    | 301341     | Biolegend |
| CD103-BV421         | Ber-ACT8 | 1:100    | 563882     | BD        |

**Suppl. Table 12:** Treatment details of Anti CTLA4 treated melanoma patients

|        | Sex | Age | No. of Infusions | Duration between Therapy start and PBMC isolation in days | PBMC | Serum |
|--------|-----|-----|------------------|-----------------------------------------------------------|------|-------|
| Pat 1  | f   | 67  | 4                | 63                                                        | x    | x     |
| Pat 2  | m   | 35  | 4                | 63                                                        |      | x     |
| Pat 3  | f   | 32  | 4                | 61                                                        | x    |       |
| Pat 4  | f   | 50  | 4                | 65                                                        |      | x     |
| Pat 5  | m   | 66  | 4                | 66                                                        |      | x     |
| Pat 6  | f   | 68  | 4                | 68                                                        |      | x     |
| Pat 7  | f   | 72  | 2                | 65                                                        |      | x     |
| Pat 8  | m   | 34  | 4                | 63                                                        | x    |       |
| Pat 9  | f   | 47  | 4                | 66                                                        | x    | x     |
| Pat 10 | m   | 49  | 4                | 63                                                        | x    | x     |
| Pat 11 | m   | 39  | 4                | 62                                                        | x    | x     |
| Pat 12 | m   | 50  | 4                | 63                                                        |      | x     |
| Pat 13 | f   | 15  | 4                | 70                                                        |      | x     |
| Pat 14 | f   | 67  | 4                | 63                                                        |      | x     |
| Pat 15 | m   | 62  | 4                | 63                                                        |      | x     |
| Pat 16 | m   | 75  | 4                | 63                                                        |      | x     |
| Pat 17 | f   | 70  | 4                | 64                                                        |      | x     |
| Pat 18 | m   | 46  | 4                | 63                                                        |      | x     |
| Pat 19 | f   | 35  | 4                | 72                                                        | x    |       |

## Reference List:

- 1 Gousopoulos, E. *et al.* Regulatory T cell transfer ameliorates lymphedema and promotes lymphatic vessel function. *JCI Insight* **1**, e89081, doi:10.1172/jci.insight.89081 (2016).
